# Supplementary material for: Coevolving MAPK and PID phosphosites indicate an ancient environmental control of PIN auxin transporters in land plants
Source: PubMed Central journal article supplement (PMC5814726; doi:10.1002/1873-3468.12929), 2017-12-25
Supplement: FEB2-592-89-s001.pdf [file FEB2-592-89-s001.pdf]

## Supporting Information

### Dory *et al.* – Co-evolving MAPK and PID Phosphosites Indicate an Ancient Environmental Control of PIN Auxin Transporters in Land Plants

PpPIN2 MLTGGQFYDVLCAVVPLYVALFLGYGSLKWWGVV**TP**EQSAGISRFNALIAMPLIFEIIA  
OsPIN5 MITGSEVYQVVEAMAPLYTAAALGYGYSVRWLKAFSNEQCAGINHFVALYAVPVLIFDMVS  
OsPIN4 MIGWGDVYKVVGAMAPLYFALGLGYGYSVRWWRFFFTAEQCAAINTMVVYFSMPFFTFDFVV  
OsPIN5B MIGWGDVYKVVAAAMAPLYFALGLGYGYSVRWWRFFFTADQCDVNRVAVPFFAFDFAA  
AtPIN8 MINCGDVYKVEAMVPLYVALILGYGYSVKWWHIFTRDQCDAINRLVCYFTLPLFTIEFTA  
OsPIN6 MIGWGDVYKVVAAATVPLYFALFLGYGYSVRWWRIFTRDQCDAVNRVAVFFALPFFTFEFTL  
AtPIN5 MISWLDIYHVVSATVPLYVSMTLGFLSARHLKLF**SP**EQCAGINKFVAKFSIPLLSFQIIS  
AtPIN6 MITGNEFYTVCMAPLYFAMFVAYGSVKWCKIF**TP**AQCSGINRFVSVFVAVPVLFSHFIS  
PpPINC MITGHDYVNVLSAMVPLYVAMMLAYGSVKWWGIL**TP**QQCDGINRFVSVFVAVPVLFSHFIS  
PpPINA MINGHDIYNVLSAMVPLYVAMMLAYGSVKWWGIL**TP**QQCGGINRFVSVFVAVPVLFSHFIS  
PpPINB MINGHDIYNVLSAMVPLYVAMMLAYGSVKWWGIL**TP**QQCGGINRFVSVFVAVPVLFSHFIS  
OsPIN3B MISWHELYMVLAVVPLYVAMMLAYGSVKWWGIL**TP**EQCSGINRFVAVIAVPLLSFHFIS  
AtPIN2 MITGKDMYDVLAAVPLYVAMMLAYGSVRWWGIF**TP**DQCSGINRFVAVFVAVPVLFSHFIS  
OsPIN2 MITGRDIYDVLAAIVPLYVAMMLAYGSVRWWGIF**TP**DQCSGINRFVAVFVAVPVLFSHFIS  
AtPIN4 MITWHDLYTVLTAIVPLYVAMMLAYGSVQWVKIF**SP**DQCSGINRFVAVFVAVPVLFSHFIS  
AtPIN7 MITWHDLYTVLTAIVPLYVAMMLAYGSVRWWKIF**SP**DQCSGINRFVAVFVAVPVLFSHFIS  
AtPIN3 MISWHDLYTVLTAIVPLYVAMMLAYGSVRWWKIF**SP**DQCSGINRFVAVFVAVPVLFSHFIS  
OsPIN3A MISGHDFYTVMAAVVPLYVAMMLAYGSVRWWGIF**TP**DQCSGINRFVAVFVAVPVLFSHFIS  
OsPIN1B MITVVDLYHVLTAIVPLYVAMMLAYGSVRWWKIF**SP**DQCSGINRFVAVFVAVPVLFSHFIS  
AtPIN1 MITAADFYHVMTAMVPLYVAMMLAYGSVKWVKIF**TP**DQCSGINRFVAVFVAVPVLFSHFIA  
OsPIN1C MITGADFYHVMTAMVPLYVAMMLAYGSVKWVKIF**TP**DQCSGINRFVAVFVAVPVLFSHFIS  
OsPIN1A MITAADFYHVMTAMVPLYVAMMLAYGSVKWVKIF**TP**DQCSGINRFVAVFVAVPVLFSHFIS  
\*: :.\* \*: \* \*\*\* : :.: \* .. .: \*. .:. : :\*: : : :

T35

PpPIN2 FNNPYTMNRLIAAYCLSNIGIVLVGLCAWV-----WCT-----KCG----N--LD-WV  
OsPIN5 TNNVYKMNRLIAADTLQKAVLLLGLMAWAL----WERSRARGAGAKAKAAVSSPLQ-WV  
OsPIN4 RTDPFAMNYRVAADAVSKAIAAAMAAR-----T-----RCGCAAAGAKAQSWS  
OsPIN5B RIDPFALSRYVLAADALSCLAVALAALAAACAASTR-CCGSGGKRGG---GGGFS-WC  
AtPIN8 HVDPFNMNYRFAADVLSKVIIVTVLALWAK----Y-S-----NKG----S--YC-WS  
OsPIN6 HTDPFQVNYRAADVISKAVIVAVIGAWAR----F-M-----SKG----GCAVS-WS  
AtPIN5 ENNPFKMSPKLILSDILQKFLVVVVLAMVLR----FWH-----PTGGRGK--LG-WV  
AtPIN6 QNNPYKMDTMFILADTLKIFVFLVLLSLWAV----F-F-----KAG----G--LD-WL  
PpPINC GNNPYEMNFRFAADAVSKVFLSCLGLWVR----F-S-----KRG----S--LE-WV  
PpPINA GNNPYAMNFRFAADAVSKVLLCLGLWAR----Y-A-----KRG----S--LE-WM  
PpPINB GNNPYAMNFRFAADAVSKVFLCLGLWAR----Y-S-----KRG----S--LE-WM  
OsPIN3B SSDPYAMNLRFAADTLQKVLVLAALAAWSRFPARF-V-----PPA----WPPLD-CS  
AtPIN2 SNDPYAMNYHFLAADSLQKVLILAALFLWQA----F-S-----RRG----S--LE-WM  
OsPIN2 TNDPYSMNYRFLAADSLQKVLILAALAVVHNLNLSRY-R-----RNGGAAAS--LD-WT  
AtPIN4 TNDPYAMNFRFAADTLQKIMLVLLALWAN----L-T-----KNG----S--LE-WM  
AtPIN7 SNNPYAMNLRFAADTLQKIMLTLI IWAN----F-T-----RSG----S--LE-WS  
AtPIN3 TNNPYAMNLRFAADTLQKIMLTLI IWAN----F-T-----RSG----S--LE-WS  
OsPIN3A TNDPYAMNLRFLAADTLQKLLVLAAGLAWSR----LPS-----RTG----APRLD-WS  
OsPIN1B TNNPFAMNLRFLAADTLQKLVLLALWCR----L-S-----ARG----S--LD-WL  
AtPIN1 ANNPYAMNLRFLAADSLQKIVVLSLLFLWCK----L-S-----RNG----S--LD-WT  
OsPIN1C TNNPYTMNLRFAADTLQKLVLLALWWSH----L-S-----RRG----S--LE-WT  
OsPIN1A TNNPYTMNLRFAADTLQKMLVLAAMLTAWSH----L-S-----RRG----S--LE-WT  
: : . : : : . :

PpPIN2 ITLFQLSVMPNTIIVGIPVLSPLYS-----VTESGIAAIFIGQVLWLFPTLFLYELKEV  
OsPIN5 ITCFVSVASLPNTIIMGVPLLNMGYGPV----SKDLMKQIVVMQFCIWINVIFLYEYMAA

OsPIN4 ITGFSLAALNNTLVVGVPLLDAMYGRW----AQDLVVQIAVVQSMVWFPLLLMAFELRKA  
 OsPIN5B ITGFSLATLNNNTLVVGVPLLDAMYGKW----ARDLIVQISVVQTIVYFPLLLLAFEVRRRA  
 AtPIN8 ITSFSLCTLNSLVVGVPLAKAMYQQ----AVDLVVQSSVQAI VWLTLTLLFLVLEFRKA  
 OsPIN6 ITSFSLSTLNSLVVGVPMARAMYGEW----AQQLVVQLSVFQAI VWLTLTLLFLVLEFRKA  
 AtPIN5 ITGLSISVLPNTLILGMPILSAIYGDE----AASILEQIVVLQSLI WYTLLFLFELNAA  
 AtPIN6 ITLFSIATLPNTLVMGIPLLQAMYGDY----TQTLMVQLVVLQCI I WYTLLFLFELRAA  
 PpPINC ITLFMLTTIPNTLVIGTPLLAAAMYGSK----PGQLTVQAVVLQCI I WYTLLFLVMEYRRA  
 PpPINA ITLFVLITIPNTLVMGTPLLAAMYGAG----PGDLTVQAVVLQCI I WYTLLFLVMEYRRA  
 PpPINB ITLFVLITIPNTLVMGTPLLAAMYGPG----PGDLTIQAVVLQCI I WYTLLFLVMEYRRA  
 OsPIN3B ITLFSVSTLPNTLVMGIPLLVS MYGPY----SGDLMVQIVVLQSI WYTLLFLFEFRAA  
 AtPIN2 ITLFSLSTLPNTLVMGIPLLRAMYGDF----SGNLMVQIVVLQSI WYTLLMLFLFEFRGA  
 OsPIN2 ITLFSLSTLPNTLVMGIPLLRAMYGDF----SGSLMVQIVVLQSVI WYTLLMLFLFEYRGA  
 AtPIN4 ITIFSLSTLPNTLVMGIPLLIAMYGTY----AGSLMVQVVVLQCI I WYTLLFLFEYRGA  
 AtPIN7 ITIFSLSTLPNTLVMGIPLLIAMYGEY----SGSLMVQIVVLQCI I WYTLLFLFEYRGA  
 AtPIN3 ITIFSLSTLPNTLVMGIPLLIAMYGEY----SGSLMVQIVVLQCI I WYTLLFLFEFRGA  
 OsPIN3A ITLFSLSTLPNTLVMGIPLLIAMYGPY----SGSLMVQIVVLQCI I WYTLLMLFLFEFRAA  
 OsPIN1B ITLFSLSTLPNTLVMGIPLLKGM YAAAADVDSGSLMVQIVVLQCI I WYTLLMLFLFEYRGA  
 AtPIN1 ITLFSLSTLPNTLVMGIPLLKGM YGNF----SGDLMVQIVVLQCI I WYTLLMLFLFEYRGA  
 OsPIN1C ITLFSLSTLPNTLVMGIPLLKGM YGEF----SGSLMVQIVVLQCI I WYTLLMLFMFEYRGA  
 OsPIN1A ITLFSLSTLPNTLVMGIPLLKGM YGEF----SGSLMVQIVVLQCI I WYTLLMLFMFEYRGA  
 \*\* : : : \*:::\* \* : : \* . . . : : : . \* .

PpPIND RKM-----  
 OsPIN5 RRSASAPPASSE-----GSAKISP-----SSPVKAAAAAADT-----  
 OsPIN4 WVV-----  
 OsPIN5B TTAAAPPPPTG-----  
 AtPIN8 GF-----  
 OsPIN6 AIGMYVDGAEAAA-----  
 AtPIN5 RAL-----PSSGA-----SL-----  
 AtPIN6 RLLIRAEFPGQAAGSI AKIQVDDVVISL---DG-MDPLRTEFETDVNGRIRLRIRRSVSS  
 PpPINC RILIMHRFPENAA-SIVSFKVESDVMSL---DG-PDPVLTEAEFRNDGKLVHVRVRSVSS  
 PpPINA KILIMQQFPENAA-SIVSFKVDSVMSL---DG-REPVLTEAEIGDDGKLVHVKVRSVSS  
 PpPINB KILIMQQFPENAG-SIVSFKVDSVMSL---DG-REPVLTEAEIGDDGKLVHVKVRSVSS  
 OsPIN3B RVLIAAQFPDTAA-SIAAVHVPDPVVS L---EGSQA--EHAAEVAPDGRLRMVCRSSVS  
 AtPIN2 KLLISEQFPETAG-SITSFRVDSVVISL---NG-REPLQTD AEIGDDGKLVHVVRRSSAA  
 OsPIN2 KALISEQFPDPV GASIASFRVDSVVS L---NG-REALQADAEVGRDGRVHVIRRSASA  
 AtPIN4 KLLIMEQFPETGA-SIVSFKVESDVVS L---DG-HDFLETDAEIGNDGKLVHVTVRKSNAS  
 AtPIN7 KILIMEQFPETGA-SIVSFKVESDVVS L---DG-HDFLETDAQIGDDGKLVHVTVRKSNAS  
 AtPIN3 KMLIMEQFPETAA-SIVSFKVESDVVS L---DG-HDFLETDAEIGDDGKLVHVTVRKSNAS  
 OsPIN3A RMLIADQFPDTAA-SIVSLHVPDPVVS L---EGGHA--ETEAEVAADGRLHVTVRRSSVS  
 OsPIN1B RLLVMEQFPDTAA-SIVSFRVDSVVS LAGGGGGAELQAEAEVGGDGRMRVTVRKSTSS  
 AtPIN1 KLLISEQFPDTAG-SIVSIHVDS DIMSL---DG-RQPLETEAEIKEDGKLVHVTVRRSNAS  
 OsPIN1C RILITEQFPDTAG-AIASIVVDADVVS L---DGRRDMIETEAEVKEDGKIHVTVRRSNAS  
 OsPIN1A RMLITEQFPDTAA-NIASIVDPDVVS L---DGRRDAIETEETEVKEDGRIHVTVRRSNAS

PpPIND -----GQPAVGSVA-----  
 OsPIN5 -----NGNAVAADRPQEVAVNIEITEMAAS---TARDGV-----  
 OsPIN4 -----GGG-----  
 OsPIN5B -----  
 AtPIN8 -----SSNNIS-DVQVDNI-----  
 OsPIN6 -----  
 AtPIN5 -----  
 AtPIN6 -----VPDSVM----SSSLCLTPRASNLNLS-NAEIFS VNTPNNRFFHGGGSGTLQFY  
 PpPINC R--SQGVHSANHSI---PSSKALTPRASNLNLS-NAEIYSMNSSVNLTPRGS-----  
 PpPINA R--SQGMHSAHSM---PSSKALTPRPSNLT-GAEIYSMHSSVNLTPRDS-----  
 PpPINB R--SQGMHSAHSM---PSSKALTPRPSNLT-GAEIYSMHSSVNLTPRDS-----  
 OsPIN3B ---RRSAAA-----AATPRASNLNLT-GVEIYSSISSRNATPRGST-----  
 AtPIN2 SSMISSFNKSHGGG---LNSSMI TPRA SNLT-GVEIYSVQSSREPTPRAS-----

OsPIN2 STTGGGGGAARSGVSRAYGASNAM**TPRAS**SNLT-GVEIYSLQTSRE**P****TPRAS**SS-----  
 AtPIN4 -----RRSLMM**TPRPS**SNLT-GAEIYSLSS-----**TPRGS**SN-----  
 AtPIN7 ---RRSFYG-----GGGTMM**TPRPS**SNLT-GAEIYSLNT-----**TPRGS**SN-----  
 AtPIN3 RRS-----FCGPNM**TPRPS**SNLT-GAEIYSLST-----**TPRGS**SN-----  
 OsPIN3A -----RRSL**L****TPRPS**SNLT-GAEIYSLSSSRNP**TPRGS**SN-----  
 OsPIN1B RSEAACSHGTQ-----SHSQSMQPRV**S**NLS-GVEIYSLQSSRN**P****TPRGS**SS-----  
 AtPIN1 ---RSDIYSRRSQ-----GLSA**TPRPS**SNLT-NAEIYSLQSSRN**P****TPRGS**SS-----  
 OsPIN1C ---RSDVYSRRSM-----GFSST**TPRPS**SNLT-NAEIYSLQSSRN**P****TPRGS**SS-----  
 OsPIN1A ---RSDIYSRRSM-----GFS-ST**TPRPS**SNLT-NAEIYSLQSSRN**P****TPRGS**SS-----  
T227 T248

PpPIND -----QRNSFSVA-----  
 OsPIN5 -----  
 OsPIN4 -----GGVGPA-----  
 OsPIN5B -----  
 AtPIN8 -----  
 OsPIN6 -----  
 AtPIN5 -----EHTGNDQEE-----  
 AtPIN6 NGSNEIMFCNGDLGGFGFTRPGLGASPR---RLSGYASS-----DAYSLQ-----**P****TPRA**  
 PpPINC ---FDRGED--CSTMAHRDPN-----RKS<sup>N</sup>FDTS-----DIYSLQ-SSR**G****P****TPRN**  
 PpPINA -----FNQGEF--HSMMSQRSPH-----RQSNFDTS-----DVYSLQ-SSR**G****P****TPRS**  
 PpPINB -----FNQGEY--FSMMAQRSPH-----RQSNFDIS-----DVYSLQ-SSR**G****P****TPRT**  
 OsPIN3B -----FTLADI-----PGHQPPNSALRASSFGAA-----DLFSLHSSSRQH**TPRP**  
 AtPIN2 -----FNQADF--YAMFNASKAPSPRHGYTNSYGGAGAGPGGDVYSLQ-SSK**G****V****TPRT**  
 OsPIN2 -----FNQADF--YAMFSGSKMA-----S-----QMASPMAQHGGAGGRA  
 AtPIN4 -----FNHSDF--YSVMGFPGG-----RLSNFGPA-----DLYSVQ-SSR**G****P****TPRP**  
 AtPIN7 -----FNHSDF--YSMMGFPGG-----RLSNFGPA-----DMYSVQ-SSR**G****P****TPRP**  
 AtPIN3 -----FNHSDF--YNMMGFPGG-----RLSNFGPA-----DMYSVQ-SSR**G****P****TPRP**  
 OsPIN3A -----FNHADP--FAMVGGGPPPTPAAVRGSSFGAS-----ELYSLQ-SSR**G****P****TPRQ**  
 OsPIN1B -----FNHAEF--FNI<sup>V</sup>GNKQ-----G-----DEEKGAAGGGGH**SPQP**  
 AtPIN1 -----FNHTDF--YSMMASGGG-----RNSNFGPG-----EAVF---GSK**G****P****TPRP**  
 OsPIN1C -----FNHTDF--YSMVG-----RSSNFAAG-----DAFGVR---TGA**TPRP**  
 OsPIN1A -----FNHTDF--YSMVG-----RSSNFGAA-----DAFGVR---TGA**TPRP**  
T286

PpPIND -----  
 OsPIN5 -----  
 OsPIN4 -----  
 OsPIN5B -----  
 AtPIN8 -----  
 OsPIN6 -----  
 AtPIN5 ANIEDEP-----  
 AtPIN6 **S**NFNELD-----VNGNGTPVWMKSPAA-----GR--  
 PpPINC **S**NFNEENSKEVHNHRGALNVNIPRFAPPLYRNGSGR<sup>L</sup>FMARSDLG<sup>V</sup>GALSFEPAAH--  
 PpPINA **S**NFNEENSKDIHTHHRGLNMNSPRFAPPLYRNGMGARMFTPRPGLGGIGVPGTDCTGHGT  
 PpPINB **S**NFNEENSKDMHTHHRGLNLTSPRFVPPLYRNVAGGRMFMPRTGLGGLPVHGN<sup>D</sup>PTGHGS  
 OsPIN3B **S**SFDEHA-----AA--  
 AtPIN2 **S**NFDEEV-----MKTAKKAGRGGRSMSGEL-----  
 OsPIN2 QGLDEQV-----TNKFASGKAADPPS-----  
 AtPIN4 **S**NFEENN-----AVKYGFYMN<sup>T</sup>NSVPAAGS-----  
 AtPIN7 **S**NFEESCAMA-----SSPRFGYYPGGAPGS-----  
 AtPIN3 **S**NFEENCAMA-----SSPRFGYYPGGGAGS-----  
 OsPIN3A **S**NFDEHSA-----  
 OsPIN1B -----  
 AtPIN1 **S**NYEEDGGPA-----KPTAAGTAAGAGRFHYQSG-----  
 OsPIN1C **S**NYEEDAA-----APNKAGSKYQ-----  
 OsPIN1A **S**NYEDDA-----SKPKYPLPASNAAPMAGH-----

PpPIN1D -----  
 OsPIN5 -----  
 OsPIN4 -----  
 OsPIN5B -----  
 AtPIN8 -----  
 OsPIN6 -----  
 AtPIN5 -----  
 AtPIN6 -----IYRQSSPKM-----  
 PpPINC -----SMGPDGRTIYPGITVVTNSVAA-----VPASGVSTHIINPVFSPLVSQV  
 PpPINA LSTLGGAPGMGPDGRTIYPGSQTAINILTLGGAANVNATAPSTAVNTQIVNPVYSPQASQI  
 PpPINB LSTLGTTPGMGPDGRTIYPGSQTAISLVTGGTGNIAATPL-SSSLNTQIVNPVYSPRASQI  
 OsPIN3B -----RARASATV-----  
 AtPIN2 -----YNNNSVPSYPPPNPMFTGSTSGASGVKKKESGGGGSGGG-----  
 OsPIN2 -----YPAPNPGMMPAPRKKELG-----  
 AtPIN4 -----YPAPNPEFSTGTGVSTKPNKIPKENQQQLQEKD-----  
 AtPIN7 -----YPAPNPEFSTGNKTGSKAPKENHHHV-----  
 AtPIN3 -----YPAPNPEFSSTTTSTANKSVNKNPKDVNTNQQTTLPTGG-----  
 OsPIN3A -----RPPKPPATTT-----  
 OsPIN1B -----  
 AtPIN1 -----GSGGGGGAHYAPNPGMFSPNTGGGGGTAAGNAPVVGG-----  
 OsPIN1C -----YPAPNPAMAAPPKPKKAANG-----  
 OsPIN1A -----YPAPNPAVSSAPKGAKKAA-----

S337

PpPIN1D -----NGESG  
 OsPIN5 -----SGETT  
 OsPIN4 -----VMSSSSSP-----EKQSD  
 OsPIN5B -----TDDDD  
 AtPIN8 -----NIESG  
 OsPIN6 -----AAGKD  
 AtPIN5 -----KEEED  
 AtPIN6 -----MWESGQRHAAK----DINGSVPE-----KEISF  
 PpPINC AKKVNDPRASIPKTDEEAKELHMFVSSANPTSVSE-GELHVFVGGSDISINL---QOSVN  
 PpPINA AKKVNDPKAS-PRADEDAKELHMFVWSANASPVSE-AGLHVFGGNDTSANL---QORFD  
 PpPINB AKKVNDTRTS-PKSDEDAKELHMFVWSANASPVSE-AGLHVFGGNDTSANL---HQSFD  
 OsPIN3B -----APTNDLKDTHMIEWSSGASAASEVTGLPVFRSGRETRRLVP--SDAPS  
 AtPIN2 -----VGVGGQNKEMNMFVWSSSASPVSEANAKNAMTRGSS-----TDVST  
 OsPIN2 -----GSNSNSNKELMHFVWSSSASPVSE---ANLRNAVNHAAST----DFASA  
 AtPIN4 -----SKASHDAKELHMFVWSSSASPVSD----VFGGGAGDNVATE--QSEQG  
 AtPIN7 -----KSNSNDAKELHMFVWSSSASPVSDRAGLQVDNGANEQVVK----SDQGG  
 AtPIN3 -----KSNSHDAKELHMFVWSSSASPVSDRAGLNVFGGAPDNDQGG---RSDQG  
 OsPIN3A -----GALNHDAKELHMFVWSSSASPVSEVSGLPVFGGGGGG-----ALDVG  
 OsPIN1B -----VVGKRKDLHMFVWSSSASPVSER-----AAAAA  
 AtPIN1 -----KRQDGNRDLHMFVWSSSASPVSD----VFGGGGGNHADYSTATNDH  
 OsPIN1C -----QAKGEDGKDLHMFVWSSSASPVSD----VFGNGAEY-----NDAAA  
 OsPIN1A -----TNGQAKGEDLHMFVWSSSASPVSD----VFGGGAPDY-----NDAAA

S377

PpPIN1D TRE-----NGTEHGHE-----  
 OsPIN5 AAAKEVSSGEVAPVEEEEA-----  
 OsPIN4 VEMNGAVVAAPGGGGGVRL-----  
 OsPIN5B VEDGAAAAATAAAA-----  
 AtPIN8 KRETVVV-----  
 OsPIN6 VEAAGAAAAAGTVVVAAAA-----  
 AtPIN5 EEEVAI-----  
 AtPIN6 RDALKAAPQATAAGGGASM-----E-EGAAGK-----  
 PpPINC PKELHVHVHPQSEHHLPGAANHKTQ-----DEHARQ-GFSFGNRR----DLKVEDVDNNG  
 PpPINA PKEVRMLVHPQLDRGLAAA-SPRTY-----DEYTRE-DFSFGNRR----DLKLEDLDKDG  
 PpPINB PKEVRMLVHPQSDLRHPEA-NPRTY-----DNYAQE-DFSFGNRR----DLKLEDLDKDG

OsPIN3B IASSRVIRPPPGATGGERA-----ASF-NKAVGGQ-----DELAKLE  
AtPIN2 DPKVSIIPPHDNLATKAMQN-----LIE-NMSPGRKG----HVEMDQDGNNG  
OsPIN2 PPPAAVPVGGATPKGVSGSVTPAAK-----NGGGEL-EIEDG-----LKSPA  
AtPIN4 AKEIRMVVSQPRKSNARG----GG-----DDIGGL-DSGEGE-----EIEKAT  
AtPIN7 AKEIRMLISDHTQNGENKA-----GPM-NGDYGG-----EEESERVKEVP  
AtPIN3 AKEIRMLVDPQSHNGETKAVAHPAS-----GDFGGEQQFSFAGK-----EEEEERPKDAE  
OsPIN3A AKEIHMVIPADLPQNNNGSGKEHEEYGAVALGGGGGGENFSGGGKTVDGAEAVDEEAALP  
OsPIN1B AGAVHVFGGGGADHGDAKG-----AQAYD-EYSFGNKN-----EKDG  
AtPIN1 QKDVKISVPQNSNDNQYV-----ERE-EFSFGNKDDDSKVLATD-----  
OsPIN1C VKEVRMAVASPRKADGVER-----D-DFSFGNRGVAERDAEAGDEKSVA  
OsPIN1A VKSPRKMDGAKDREDYVER-----D-DFSFGNRG----VMDRDAEAGDE

PpPIND -----MAPSQMNLKEMAIKVAKKMV  
OsPIN5 -----SAPAPSMKHVIWMA-VKKLL  
OsPIN4 -----PFWATARTV----GLKLA  
OsPIN5B -----RRSLWPLVRVAV----WLKVA  
AtPIN8 -----GEKSFLE-----VMSLVWLKLA  
OsPIN6 -----G-----KPSLWALVKVV----AHKLA  
AtPIN5 -----VRTRSVGTMKILLKAWRKKLI  
AtPIN6 -----DTTPVAAIGKQE-----MPSAIVMMRLIILTVVGRKLS  
PpPINC SKLDKKF--RSILTAELAPKHPMDEG---KTS-----MPPSSVMIKLICVMTFRKLT  
PpPINA PRLDKF--GSTSTAELTPKLAEDEA---KKS-----MPPSAVMIKLIAVMTFRKLV  
PpPINB PRLDNKF--GSTSTAELTPKVPEDA---KKS-----MPPSAVMIKLIAVMTFRKLV  
OsPIN3B AGAKTE---QQTAVTTTTTKGGAAG---AER---ARGQQNAPAGVMLRLLITTVWRRLI  
AtPIN2 -----GKSPYMGKKGSDVEDGGPGPRKQQ-----MPPASVMTRLILIMVWRKKLI  
OsPIN2 AGLAAKFPVSGSPYVAPRKGGGADV---PGL---AEAHPMPPTSVMTRLILIMVWRKKLI  
AtPIN4 AGLNKM---GSNSTAELEAAGDGGG---NNGTH-----MPPTSVMTRLILIMVWRKKLI  
AtPIN7 NGLHKL---RCNSTAELNPKAEIETG---ETV---PVKHMPPASVMTRLILIMVWRKKLI  
AtPIN3 NGLNKL---APNSTAALQSKTGLGGAEASQRKN-----MPPASVMTRLILIMVWRKKLI  
OsPIN3A DGLTKM---GSSSTAELHPKVVDVDGPNAGGGAAGAGQYQMPPASVMTRLILIMVWRKKLI  
OsPIN1B PTL SKL---GSNSTAQLRPKDDGEGM---AAA-----MPPASVMTRLILIMVWRKKLI  
AtPIN1 -----GGNNISNKTTOAKV-----MPPTSVMTRLILIMVWRKKLI  
OsPIN1C AAVS-----GEHGKPLTPAPTA-----MPPTSVMTRLILIMVWRKKLI  
OsPIN1A KAAAAA---GADPSKAMAAPTA-----MPPTSVMTRLILIMVWRKKLI

: .:

PpPIND QLPLTHATVMGIVYSLIAGRWFDPRLRILRNSLDIMGRITLGLTMYSIGLFMAGQKKLVA  
OsPIN5 QIPNTYASFLGLIWSLIAFKCGFSMPKIVEDSLFTIRTTAVGLSMFSSGTFIARQSRFVP  
OsPIN4 RNPNVYASVLGVVWACIAYRWHLSLPGIVTGSQVMSRTGTGMSMFSMGLFMGQQERVIA  
OsPIN5B RNPNVYAGVLGVAWACVTNRWHVETPSIIIEGSLVIMSKTGVGLSMFSGMGLFMALQDKIIV  
AtPIN8 TNPNCYSCILGIAWAFISNRWHLLELPGILEGSILIMSKAGTGTAMFNMGIFMALQEKLIIV  
OsPIN6 RNPNTYASFGITWACLANRLHIALPSAFEGSVLIMSKSGTGMAMFSMGLFMAQQEKIIA  
AtPIN5 INPNTYATLIGI IWATLHFRGLWNLPEMIDKSIHLLSDGGLGMAMFSLGLFMASQSSIIA  
AtPIN6 RNPNTYSSLLGLVWLSLISFKWNIWMPNIVDFSIIKISDAGLGMAMFSLGLFMALQPKMIP  
PpPINC RNPNTYSSLLGVVWLSLISFKCHLDMPILILYKSYHIIISDAGIGMAMFSLGLFMGMGDRIIA  
PpPINA WNPNTYSSLLGVIWLSLVANRWHLSMPLILYKSVHILSDAGLGMAMFSLGLFMGLGDRIIV  
PpPINB WNPNTYSSLLGVIWLSLVANRWHFTMPLILYKSVHILSDAGLGMAMFSLGLFMGLGDRIVV  
OsPIN3B RNPNTYASLIGLWLSLIAFRFHITMPIIVAKSISILSDAGLGMAMFSLGLFMALQPKIIA  
AtPIN2 RNPNTYSSLFGLAWSLVSPKWNIMKPTIMSGSISILSDAGLGMAMFSLGLFMALQPKIIA  
OsPIN2 RNPNTYSSLIGLWLSLVFRWNIQMPPIIKGSISILSDAGLGMAMFSLGLFMALQPKIIS  
AtPIN4 RNPNTYSSLIGLIWALVAYRWHVAMPKILQQSISILSDAGLGMAMFSLGLFMALQPKIIA  
AtPIN7 RNPNTYSSLIGLIWALVAFRWDVAMPKIIQQSISILSDAGLGMAMFSLGLFMALQPKLIA  
AtPIN3 RNPNTYSSLIGLIWALVAFRWHVAMPKIIQQSISILSDAGLGMAMFSLGLFMALQPKLIA  
OsPIN3A RNPNTYSSLLGLAWSLVAFRWHVSMPIIVEKSISILSDAGLGMAMFSLGLFMALQPSIIA  
OsPIN1B RNPNTYSSLLGVIWLSLVSYRWGIEMPPIIARSISILSDAGLGMAMFSLGLFMALQPRIIA  
AtPIN1 RNPNSYSSLFGITWLSLISFKWNIEMPALIAKSISILSDAGLGMAMFSLGLFMALNPRIIA  
OsPIN1C RNPNTYSSLIGLIWLSLVFRWNFEMPAIILKSISILSDAGLGMAMFSLGLFMALQPRIIA  
OsPIN1A RNPNTYSSLIGLIWLSLVFRWNFEMPAIVLKSISILSDAGLGMAMFSLGLFMALQPHIIA

```

      *  :: ..*: :: : .      .  *  :      *  :*: . *  *: .  .:
PpPIN1  S-WWVAFYGAFCRFIVGPGTMGVASLLLGLRGDTLRFAFLQ AALPQAVISFVFAKDYNLH
OsPIN5  CGYKIASFSMVIKFLIGPVVMLFASLVIGMHGTL LHLIAV VQ AALPLAVTSFVYAE EYKVH
OsPIN4  CGAGLTALGMALRFVAGPLATLVGAAALGLRGDVLHLAI IQAALPQSIASFVFAKEYGLH
OsPIN5B CGAGLTVLGMALRFVAGPAATAVGAFAALGLRGD LRLAI IQAALPQSIITTFVFAKEYGLH
AtPIN8  CGTSLTVMGMVLKFIAGPAAMAIGSIVLGLHG DVLRVAI IQAALPQSITSFIFAKEYGLH
OsPIN6  CGTSFAALGLVLK FALGPAAMAIGSIAVGLRG DVLRVAI IQAALPQSITSFIFAKEYGLH
AtPIN5  CGTKMAIITMLLK FVLG PALMIASAYCIRL KSTLFKVA I LQAALPQGVVPFVFAKEYNLH
AtPIN6  CGAKKATMGMLIRFISG PLFMAGASLLVGLR GSR LHA AIVQAALPQGIVPFVFAKEYNLH
PpPINC  CGTKHALFAMLLRFLVGP AVFAAASYLVGLR GVS LNVSTVQAALPQGIVPFVFAKEYNVH
PpPINA  CGTKMAVFGMALRFLAGPAVFAAASYLVGLR GVP LKVSIVQAALPQGIVPFVFAKEYGVH
PpPINB  CGRKMAIFGMSLRFLAGPAVFAAASYLVGLR GVP LKVSIVQAALPQGIVPFVFAKEYGVH
OsPIN3B CGYSVAAASMGV RFFFGPAIMAAA SA AVGIRG TLLRIAIVQAALPQGIVPFVFAKEYNLH
AtPIN2  CGKSVAGFAMAVRFLTGP AVIAATSIAIGIR GDL LHLIAIVQAALPQGIVPFVFAKEYNVH
OsPIN2  CGKTVATFAMAVRFLTGP AVIAATSIAIGLR GVL LHV AIVQAALPQGIVPFVFAKEYNCH
AtPIN4  CGNSVATFAMAVRFITGP AIVMAGIAIGLR GDL LRIAIVQAALPQGIVPFVFAKEYNVH
AtPIN7  CGNSTATFAMAVRFFTGP AVMAVAAMAIGLR GDL LRV AIVQAALPQGIVPFVFAKEYNVH
AtPIN3  CGNSVATFAMAVRFLTGP AVMAVAAMAIAIGLR GDL LRV AIVQAALPQGIVPFVFAKEYNVH
OsPIN3A CGKSAAVVSMAVRFLAGPAVMAAASIAIGLR GTL LHV AIVQAALPQGIVPFVFAKEYNVH
OsPIN1B CGNSLASYAMAVRFLVGP AVMAAASIAVGLR GVL LHLIAIVQAALPQGIVPFVFAKEYNVH
AtPIN1  CGNRRAAF AAMRFVVGPAV MLVASYAVGLR GVL LHV AIVQAALPQGIVPFVFAKEYNVH
OsPIN1C CGNKVATFAMAVRFLTGP AVMAAASIAVGLR GTL LHV AIVQAALPQGIVPFVFAKEYSVH
OsPIN1A CGNKVATYAMAVRFLAGPAVMAAASFVGLR GTL LHV AIVQAALPQGIVPFVFAKEYSVH
      .  :      . *  **      .  : : . .  : : :*****  . : .*: *  : *
PpPIN1  TDVFTTAVSLQTIVFMP IVLVYYTLLEL--
OsPIN5  ADIMSTGVILGIFISLPVTIVYYILLGL--
OsPIN4  ADVLSTAVIFGTLISLPIL IAYAVLGFV-
OsPIN5B AEILSTAVIFGTLASLPVLIVYYIVLGFIR
AtPIN8  ADVLSTAVIFGMLVSLPVLVAYYAALEFIH
OsPIN6  ADVLSTAVIFGMLVSLPLL VGFYIVLELIR
AtPIN5  PEIISTGVIFGMLIALPTTLAYYFLLDL--
AtPIN6  PDLSTLVIFGMIVSLPVTILYYVLLGL--
PpPINC  PEILSTAVIFGMIVTLPTALLYYILLGL--
PpPINA  PEILSTAVIFGMLIALPITMVYYILLGL--
PpPINB  PEMLSTAVIFGMLIALPITMVYYILLGL--
OsPIN3B ATILCTFVIFGMLIALPITLVYYIILGL--
AtPIN2  PDILSTAVIFGMLVALPVTLYYYVLLGL--
OsPIN2  PQILSTAVIFGMLIALPITILYYVLLGI--
AtPIN4  PTILSTGVIFGMLIALPITLVYYILLGL--
AtPIN7  PAILSTGVIFGMLIALPITLVYYILLGL--
AtPIN3  PAILSTGVIFGMLIALPITLVYYILLGL--
OsPIN3A PAILSTAVIFGMLIALPITLLYYILLGL--
OsPIN1B PNILSTAVIFGMLIALPITLVYYILLGL--
AtPIN1  PDILSTAVIFGMLIALPITLLYYILLGL--
OsPIN1C PDILSTAVIFGMLIALPITLVYYILLGL--
OsPIN1A PSILSTAVIFGMLIALPITLVYYILLGL--
      .  : : *  *  :  :  : *  :  : *  *  :

```

**Supp. Fig. 1.** Sequence alignment of Arabidopsis, rice and *Physcomitrella patens* members of the UNIPROT PIN auxin efflux protein family. Multiple sequence alignment was performed by the MUSCLE algorithm (v3.8). Potential MAPK phosphorylation sites (S/TP motifs) and their positions in PIN1 are indicated underneath with red font. MAPK and PID phosphorylation sites and preferred MAPK phosphorylation flanking residues are highlighted in red, black and grey backgrounds, respectively.

**A**  $^{221}\text{SQGLSApT}^*\text{PRPSNLTNAEIYSLQSSR}^{245}$

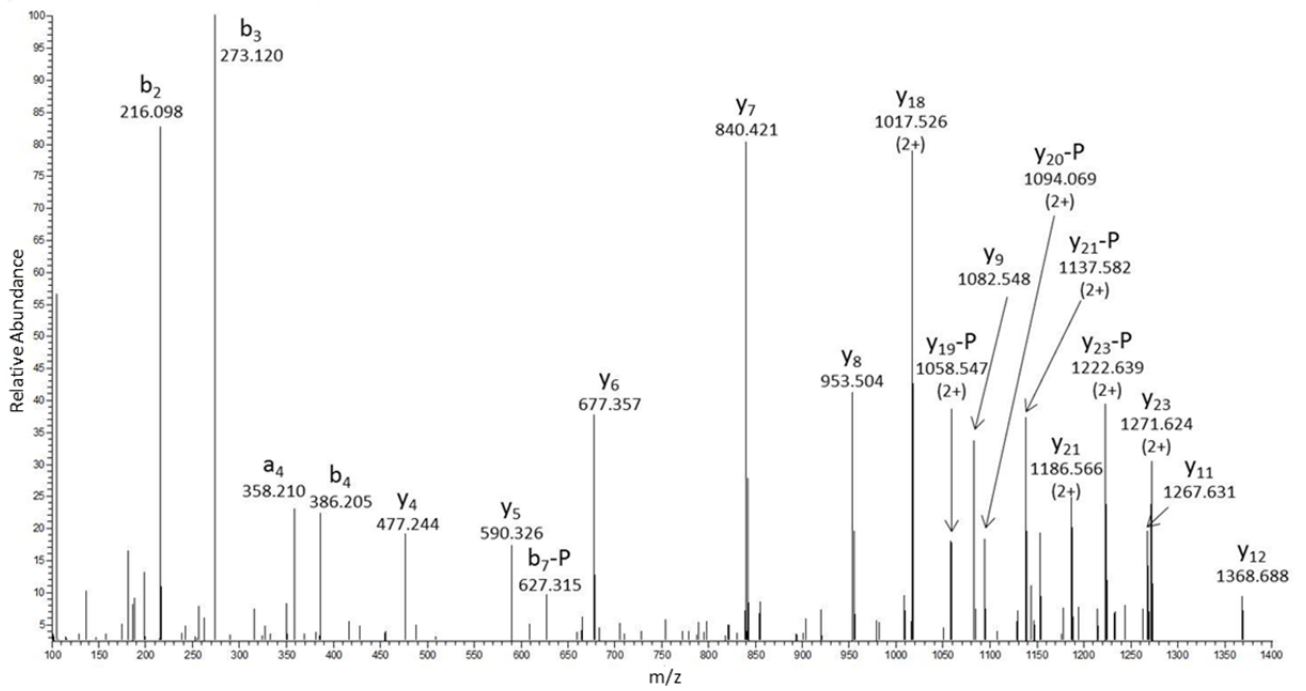

**B**  $^{221}\text{SQGLpS}^*\text{ApT}^*\text{PRPSNLTNAEIYSLQSSRNPpT}^*\text{PR}^{250}$

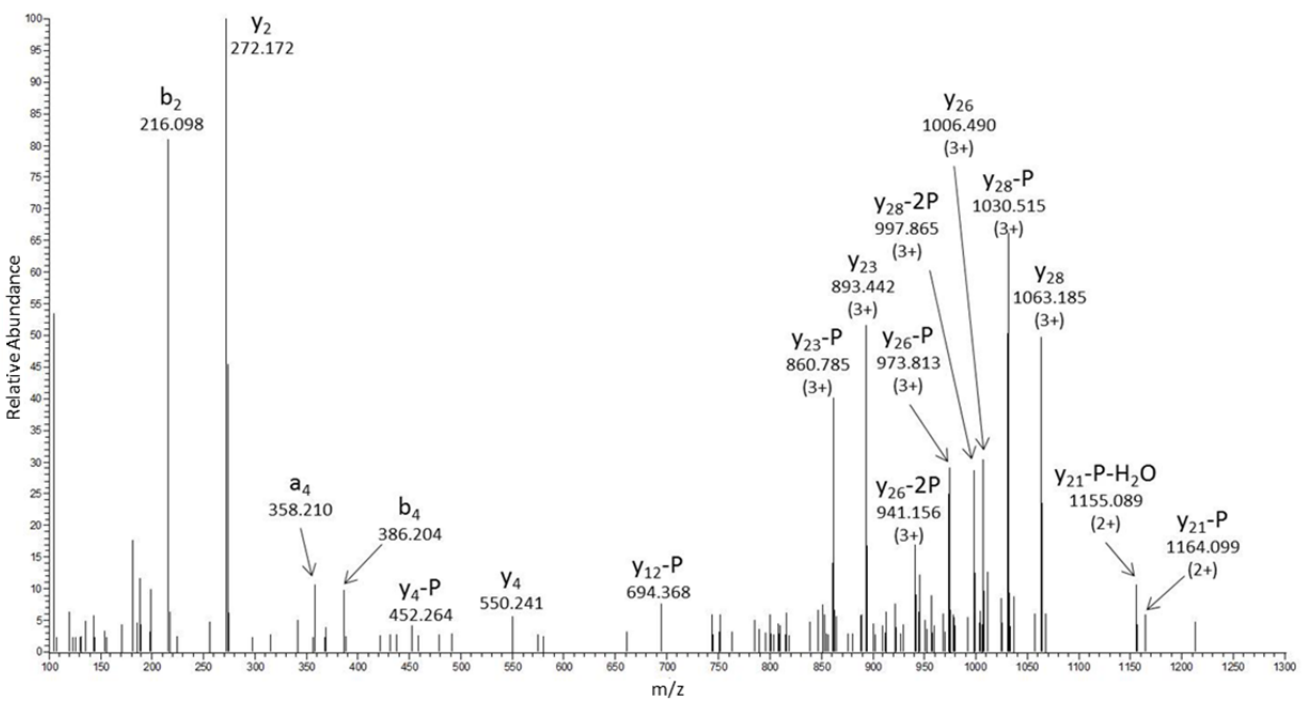

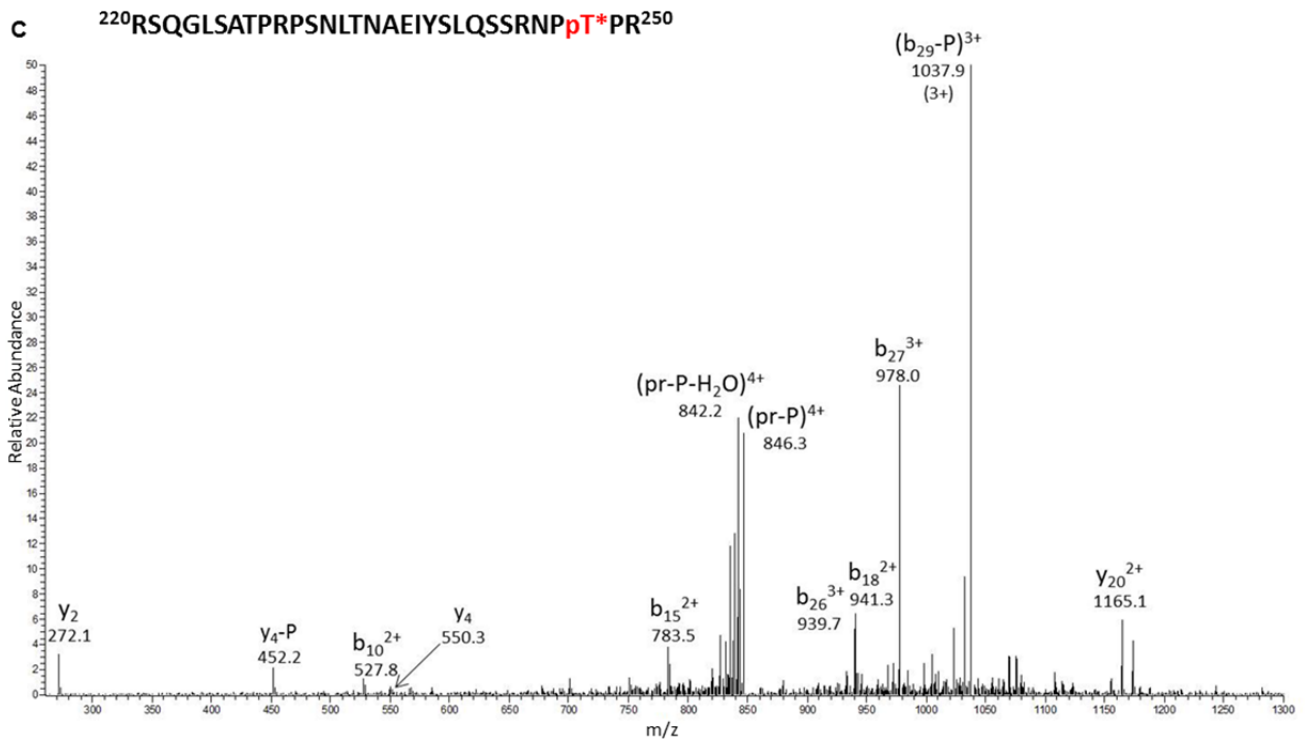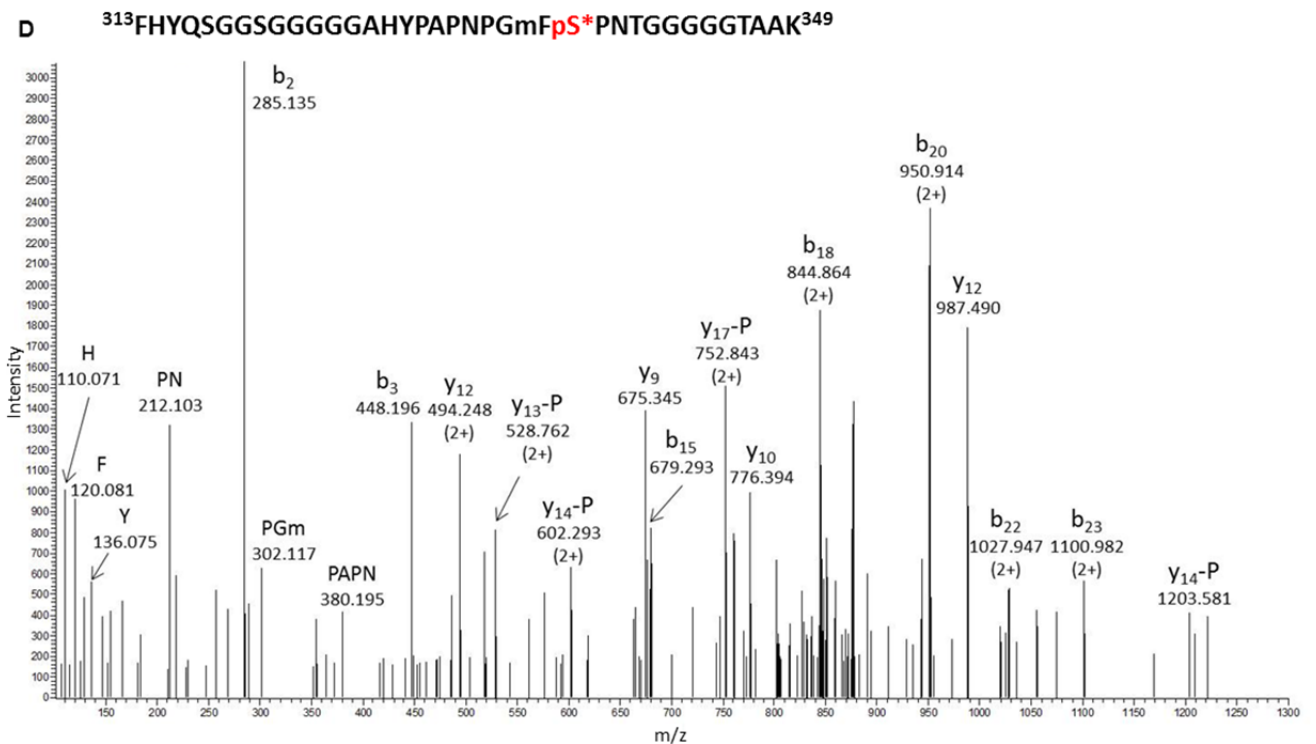

**Supp. Fig. 2.** Spectra for representative identified phosphopeptides derived from PIN1 hydrophilic loop. HCD spectrum representing T286 phosphorylation is presented as Fig. 4C in the main text.

(A-D) Sequence of the precursor peptides are indicated above the spectra. Asterisk indicates phosphorylated Serine/Threonine. Peptide fragments are labelled according to the



nomenclature by Biemann (1990). -P stands for the 98-Da neutral loss of phosphoric acid characteristic to Ser/Thr phosphorylation. (A) HCD spectrum of  $m/z$ : 919.7788 (3+) representing SQGLSApTPRPSNLTAIEIYSLQSSR, [221-245] of PIN1. Site of phosphorylation is Thr-227 as proven by unmodified  $y_{18}$  and  $y_{19}$ -P fragment ions ( $m/z$  1108.1 representing  $y_{19}$  was observed in the CID spectrum of the same precursor, data not shown). (B) HCD spectrum of  $m/z$ : 851.400 (4+) representing the doubly phosphorylated SQGLSATPRPSNLTAIEIYSLQSSRNPTPR, [221-250] of PIN1. One phosphorylation site is Thr-248 as proven by the  $y_4$  fragment ion. The other site is either Ser-225 or Thr-227 proven by the (singly phosphorylated)  $y_{23}$  and the (doubly phosphorylated)  $y_{26}$  fragment ions (indicated by blue font). (C) CID spectrum of  $m/z$ : 870.4335 (4+) representing RSQGLSATPRPSNLTAIEIYSLQSSRNPPpTPR, [220-250] of PIN1. Site of phosphorylation is Thr-248 as proven by  $y_4$  and  $b_{27}$  fragment ions. (D) HCD spectrum of  $m/z$ : 876.1229 (4+) representing FHYQSGSGGGGGGAHYPAPNPgMfPSPNTGGGGGTAAK, [313-349] of PIN1. m denotes oxidised Met. Site of phosphorylation is Ser-337 as proven by unmodified  $y_{12}$  and  $b_{23}$  fragment ions.

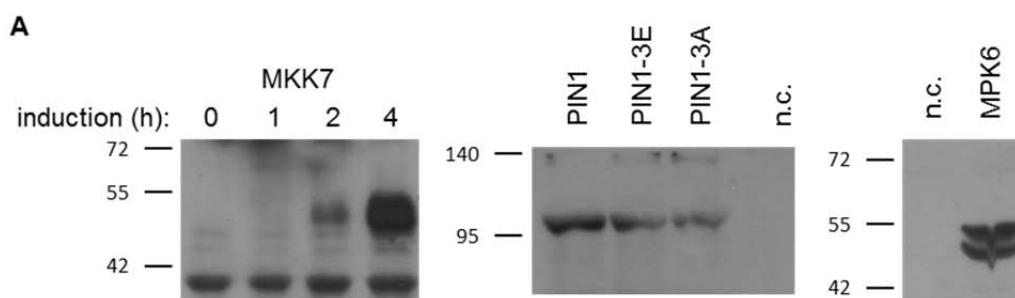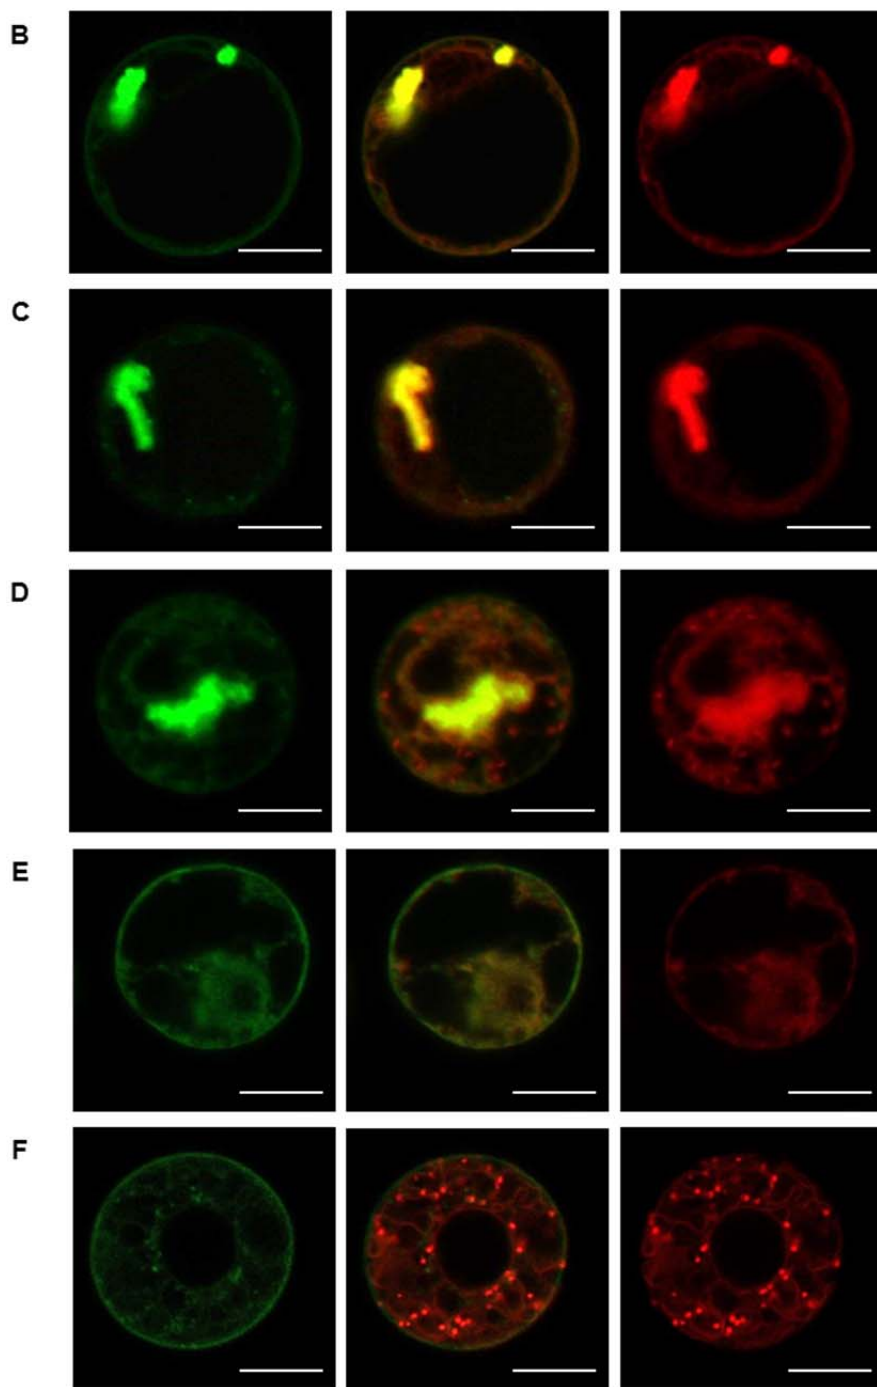

**Supp. Fig. 3.** MAPK phosphorylation status at T227, T248 and T286 influences intracellular trafficking of PIN1. (A) Immunodetection of transfected proteins. PIN1:GFP MPK6:HA and myc:MKK7 were detected by commercial antibodies recognising the respective fusion tags. n.c. denotes non-transformed control. Molecular weight (kDa) markers are indicated. Protoplasts were transformed with all constructs simultaneously, rested overnight then treated with  $\beta$ -estradiol for 4h if transfected with pER8:MKK7 prior to protein isolation or microscopy. (B-F) Co-localisation of PIN1 variants of differential phosphorylation status (green, left panels) with intracellular organelle markers (Nelson et al., 2007) (red, right panels) and merge images (middle panels). (B) PIN1 co-transformed with MPK6 and *pER8:MKK7*, induced with 1  $\mu$ M  $\beta$ -estradiol for 4h with RFP:ER marker. (C) Phosphomimetic T227E, T248E, T286E (PIN1-3E) PIN1 mutant version with RFP:ER marker. (D) PIN1-3E with RFP:Golgi marker. (E) Non-phosphorylatable T227A, T248A, T286A (PIN1-3A) with RFP:ER marker. (F) PIN1-3A with RFP:Golgi marker. Scale bar: 10  $\mu$ m.
